# Supplementary material for: Coronary Heart Disease Risk Associated with Primary Isolated Hypertriglyceridemia; a Population‐Based Study
Source: PubMed Central journal article supplement — J Am Heart Assoc. 2021 May 25;10(11):e019343. doi: 10.1161/JAHA.120.019343 (PMC8483538; doi:10.1161/jaha.120.019343), 2021-05-25

# **SUPPLEMENTAL MATERIAL**

## Data S1.

### Supplemental Methods. Incidence, relative survival, and prevalence.

Definitions:

$\lambda_i$  represent the incidence rate at age  $i$ .

$\pi_i$  represent the prevalence at age  $i$ .

$\gamma_i$  represent the relative mortality at age  $i$  (relative to the population)

and  $\theta_i$  represent the mortality at age  $i$ .

Recursion relationships:

Let  $\phi_i$  be the current mortality rate in those who do NOT have the prevalent condition.

Then  $(1 - \pi_i) * \phi_i + \pi_i * \phi_i * x = \theta_i$ , where  $x$  is the relative hazard of death for the condition relative to those without the condition. Therefore,

$$\Gamma_i = \phi_i * x / [(1 - \pi_i) * \phi_i + \pi_i * \phi_i * x]$$

Therefore,

$$\phi_i * x = \gamma_i * [(1 - \pi_i) * \phi_i + \pi_i * \phi_i * x]$$

$$x * \phi_i * (1 - \gamma_i * \pi_i) = \gamma_i * (1 - \pi_i) * \phi_i$$

Thus,

$$x = [\gamma_i * (1 - \pi_i) * \phi_i] / [\phi_i * (1 - \gamma_i * \pi_i)]$$

Now, for the recursion. We will actually not need “ $x$ ”, the relative hazard for those with and without the condition directly. In words, “The number with the disease at age  $i+1$ ” = “number with disease at age  $i$ ” - “number with disease who die” + “number of new cases”

The new population size is given by “population at  $i + 1$ ” = “population at  $i$ ” - “number of deaths”. We arbitrarily allow death to occur first, and then we add incidence into the scheme. So, if we let  $N_i$  be the population size at the  $i$ th age, we have

$$N_{i+1} = N_i * (1 - \theta_i)$$

Number alive with disease at beginning of  $i$ th epoch:  $\pi_i * N_i$ .

We now allow the force of differential mortality to occur. The number of prevalent cases who remain alive is:

$$(\pi_i * N_i) * (1 - \gamma_i * \theta_i)$$

and the number of prevalent cases who die is:

$$(\pi_i * N_i) * \gamma_i * \theta_i$$

The number of prevalent non-cases who die is the difference between the total number of deaths and this last expression. Thus, this number is:

$$\theta_i * N_i - (\pi_i * N_i) * \gamma_i * \theta_i = N_i * \theta_i * (1 - \pi_i * \gamma_i).$$

Note that this implies a constraint that  $\gamma_i < 1 / \pi_i$ .

The number of prevalent non-cases who remain alive is therefore:

$$[N_i * (1 - \pi_i) - N_i * \theta_i * (1 - \pi_i * \gamma_i)].$$

Let us now allow these prevalent non-cases to incur incidence, namely, we will have, at the end of the  $i$ th epoch:

$$[N_i * (1 - \pi_i) - N_i * \theta_i * (1 - \pi_i * \gamma_i)] * \lambda_i$$

New prevalent cases, and total number of prevalent cases at the end of the epoch will therefore be:

$$(\pi_i * N_i) * (1 - \gamma_i * \theta_i) + [N_i * (1 - \pi_i) - N_i * \theta_i * (1 - \pi_i * \gamma_i)] * \lambda_i$$

We already know the total number of individuals alive at the end of the epoch, namely  $N_i * (1 - \theta_i)$ . We can now calculate the prevalence at  $i + 1$  as:

$$\pi_{i+1} = [(\pi_i * N_i) * (1 - \gamma_i * \theta_i) + [N_i * (1 - \pi_i) - N_i * \theta_i * (1 - \pi_i * \gamma_i)] * \lambda_i] \div [N_i * (1 - \theta_i)]$$

We can eliminate  $N$  from this formula and this the recursion formula to get us from prevalence at age  $i$  to age  $i+1$ .

$$\pi_{i+1} = [\pi_i * (1 - \gamma_i * \theta_i) + [(1 - \pi_i) - \theta_i * (1 - \pi_i * \gamma_i)] * \lambda_i] \div [(1 - \theta_i)]$$

How are the components of the above formula obtained?

$\lambda_i$ : From the Poisson incidence model.

$\theta_i$ : We get this from standard life tables.

$\gamma_i$ : We get this from a relative survival model, using our incidence cases, their age/sex/calendar year, and their death/follow-up times, and again the Minnesota White survival tables.

Specifically, we calculate  $-\log(S_0(t))$  for each incidence observation, and each follow-up/death time  $t$ . We then consider this transformed time to be proportional to the cumulative hazard with proportionality constant  $\gamma$ . We can then use a censored exponential model.

**Table S1. Exclusion criteria based on the secondary causes.** Individuals were excluded if any of the following were detected within a 1 year window around the index date.

| <b>Secondary Causes</b>           | <b>Definition</b>                                                                                                                                                                                                 |
|-----------------------------------|-------------------------------------------------------------------------------------------------------------------------------------------------------------------------------------------------------------------|
| <b>Hypothyroidism</b>             | TSH >10 mIU/L                                                                                                                                                                                                     |
| <b>Significant Liver Disease</b>  | AST >130 IU/L, ALT >155 IU/L, ALP $\geq$ 200 IU/L, total bilirubin >2 mg/dL, significant alcohol abuse diagnosis codes, or AST/ALT ratio $\geq$ 2                                                                 |
| <b>Significant Kidney Disease</b> | Creatinine $\geq$ 2.6 mg/dL, GFR <15 mL/min/BSA, urine protein/creatinine ratio $\geq$ 2.95 mg/mg, and 24-hours urine protein >3,000 mg/24h, nephrotic syndrome diagnosis codes, or renal failure diagnosis codes |
| <b>Uncontrolled Diabetes</b>      | Hemoglobin A1c $\geq$ 9%                                                                                                                                                                                          |
| <b>Morbid Obesity</b>             | BMI $\geq$ 35 kg/m <sup>2</sup>                                                                                                                                                                                   |
| <b>Pregnancy</b>                  | Pregnancy, abortion, or delivery related diagnosis codes                                                                                                                                                          |

ALP, Alkaline phosphatase; ALT, Alanine Aminotransferase; AST, Aspartate Aminotransferase; BMI, Body Mass Index; BSA, Body Surface Area; GFR, Glomerular Filtration Rate; IU, International Unit; TSH, Thyroid Stimulating Hormone.

**Table S2. ICD and CPT codes used for ascertainment of coronary heart disease.**

| <b>Coronary Heart Disease</b>                             | <b>ICD-9</b>                                                                                                                                                                                                                                                                                      | <b>ICD-10</b>                                                                                                                                                                                                                                                                                                                                                                                                          | <b>CPT</b>                                                                                                                                                          |
|-----------------------------------------------------------|---------------------------------------------------------------------------------------------------------------------------------------------------------------------------------------------------------------------------------------------------------------------------------------------------|------------------------------------------------------------------------------------------------------------------------------------------------------------------------------------------------------------------------------------------------------------------------------------------------------------------------------------------------------------------------------------------------------------------------|---------------------------------------------------------------------------------------------------------------------------------------------------------------------|
| Angina                                                    | 411.1, 413.0, 413.1,<br>413.9                                                                                                                                                                                                                                                                     | I20.0, I20.8                                                                                                                                                                                                                                                                                                                                                                                                           |                                                                                                                                                                     |
| Myocardial infarction                                     | 410.00, 410.01, 410.02,<br>410.10, 410.11, 410.12,<br>410.20, 410.21, 410.22,<br>410.30, 410.31, 410.32,<br>410.40, 410.41, 410.42,<br>410.50, 410.51, 410.52,<br>410.60, 410.61, 410.62,<br>410.70, 410.71, 410.72,<br>410.80, 410.81, 410.82,<br>410.90, 410.91, 410.92,<br>429.71, 429.79, 412 | I21.01, I21.02, I21.09,<br>I21.11, I21.19, I21.21,<br>I21.29, I21.3, I21.4, I22.0,<br>I22.1, I22.2, I22.8, I22.9,<br>I23.0, I23.1, I23.2, I23.3,<br>I23.4, I23.5, I23.6, I23.7,<br>I23.8, I24.1, I25.2                                                                                                                                                                                                                 |                                                                                                                                                                     |
| Chronic ischemic heart disease / Coronary atherosclerosis | 414.00, 414.01, 414.02,<br>414.03, 414.04, 414.05,<br>414.06, 414.07, 414.2,<br>414.3, 414.4, 414.8,<br>414.9                                                                                                                                                                                     | I25.10, I25.110, I25.111,<br>I25.118, I25.119, I25.5,<br>I25.700, I25.701, I25.708,<br>I25.709, I25.710, I25.711,<br>I25.718, I25.719, I25.720,<br>I25.721, I25.728, I25.729,<br>I25.730, I25.731, I25.738,<br>I25.739, I25.750, I25.751,<br>I25.758, I25.759, I25.760,<br>I25.761, I25.768, I25.769,<br>I25.790, I25.791, I25.798,<br>I25.799, I25.810, I25.811,<br>I25.812, I25.82, I25.83,<br>I25.84, I25.89, I25.9 |                                                                                                                                                                     |
| Percutaneous coronary revascularization                   | 00.66, 36.03, 36.04,<br>36.06, 36.07, 36.09,<br>V45.82                                                                                                                                                                                                                                            | 0270xxx, 0271xxx,<br>0272xxx, 0273xxx,<br>02C0xxx, 02C1xxx,<br>02C2xxx, 02C3xxx,<br>3E07017, 3E070PZ,<br>3E07317, 3E073PZ,<br>Z95.5, Z98.61                                                                                                                                                                                                                                                                            | 92920, 92921, 92924,<br>92925, 92928, 92929,<br>92933, 92934, 92937,<br>92938, 92941, 92943,<br>92944, 92980, 92981,<br>92982, 92984, 92995,<br>92996, 92973, 92974 |
| Coronary artery bypass graft surgery                      | 36.10, 36.11, 36.12,<br>36.13, 36.14, 36.15,<br>36.16, 36.17, 36.19, 36.2,<br>V45.81                                                                                                                                                                                                              | 0210xxx, 0211xxx,<br>0212xxx, 0213xxx, Z95.1                                                                                                                                                                                                                                                                                                                                                                           | 33510, 33511, 33512,<br>33513, 33514, 33516,<br>33517, 33518, 33519,<br>33521, 33522, 33523,<br>33533, 33534, 33535,<br>33536                                       |

**Table S3. ICD and CPT codes used for ascertainment of cerebrovascular disease.**

| <b>Cerebrovascular Disease</b>  | <b>ICD-9</b>                                                                                                    | <b>ICD-10</b>                                                                                                                                                                                                                                                                                                                                                                                                                                                                                                                                                                                                                                                                                                                | <b>CPT</b>          |
|---------------------------------|-----------------------------------------------------------------------------------------------------------------|------------------------------------------------------------------------------------------------------------------------------------------------------------------------------------------------------------------------------------------------------------------------------------------------------------------------------------------------------------------------------------------------------------------------------------------------------------------------------------------------------------------------------------------------------------------------------------------------------------------------------------------------------------------------------------------------------------------------------|---------------------|
| Stroke                          | 434, 434.00, 434.01,<br>434.10, 434.11, 434.90,<br>434.91<br>437.0, 437.1                                       | I63.30, I63.311, I63.312,<br>I63.313, I63.319, I63.321,<br>I63.322, I63.323, I63.329,<br>I63.331, I63.332, I63.333,<br>I63.339, I63.341, I63.342,<br>I63.343, I63.349, I63.39,<br>I63.40, I63.411, I63.412,<br>I63.413, I63.419, I63.421,<br>I63.422, I63.423, I63.429,<br>I63.431, I63.432, I63.433,<br>I63.439, I63.441, I63.442,<br>I63.443, I63.449, I63.49,<br>I63.50, I63.511, I63.512,<br>I63.513, I63.519, I63.521,<br>I63.522, I63.523, I63.529,<br>I63.531, I63.532, I63.533,<br>I63.539, I63.541, I63.542,<br>I63.543, I63.549, I63.59,<br>I63.6, I63.8, I63.9, I67.2,<br>I67.82, I66.01, I66.02,<br>I66.03, I66.09, I66.11,<br>I66.12, I66.13, I66.19,<br>I66.21, I66.22, I66.23,<br>I66.29, I66.3, I66.8, I66.9 |                     |
| Transient ischemic attack       | 435.0, 435.1, 435.2,<br>435.3, 435.8, 435.9                                                                     | G45.0, G45.1, G45.2,<br>G45.8, G45.9                                                                                                                                                                                                                                                                                                                                                                                                                                                                                                                                                                                                                                                                                         |                     |
| Carotid artery disease          | 433, 433.00, 433.01,<br>433.10, 433.11, 433.20,<br>433.21, 433.30, 433.31,<br>433.80, 433.81, 433.90,<br>433.91 | I63.00, I63.011, I63.012,<br>I63.013, I63.019, I63.02,<br>I63.031, I63.032, I63.033,<br>I63.039, I63.09, I63.10,<br>I63.111, I63.112, I63.113,<br>I63.119, I63.131, I63.132,<br>I63.133, I63.139, I63.19,<br>I63.20, I63.211, I63.212,<br>I63.213, I63.219, I63.22,<br>I63.239, I63.29, I65.01,<br>I65.02, I65.03, I65.09,<br>I65.1, I65.21, I65.22,<br>I65.23, I65.29, I65.8, I65.9                                                                                                                                                                                                                                                                                                                                         |                     |
| Neuro-interventional procedures | 00.61, 00.63, 38.11,<br>38.12, 39.28                                                                            | 037Hxxx, 037Jxxx,<br>037Kxxx, 037Lxxx,<br>037Mxxx, 037Nxxx,<br>03CGxxx, 03CHxxx,<br>03CJxxx, 03CKxxx,<br>03CLxxx, 03CMxxx,<br>03CNxxx, 03CPxxx,<br>03CQxxx                                                                                                                                                                                                                                                                                                                                                                                                                                                                                                                                                                   | 35301, 37215, 37216 |

**Table S4. ICD codes used for ascertainment of peripheral artery disease.**

| Peripheral Artery Disease                 | ICD-9                                                                                                                   | ICD-10                                                                                                                                                                                                                                                                                                                   | CPT |
|-------------------------------------------|-------------------------------------------------------------------------------------------------------------------------|--------------------------------------------------------------------------------------------------------------------------------------------------------------------------------------------------------------------------------------------------------------------------------------------------------------------------|-----|
| Atherosclerotic peripheral artery disease | 440.20, 440.21, 440.22, 440.23, 440.24, 440.29                                                                          | I70.201, I70.202, I70.203, I70.209, I70.211, I70.212, I70.213, I70.219, I70.221, I70.222, I70.223, I70.229, I70.231, I70.232, I70.233, I70.234, I70.235, I70.238, I70.239, I70.241, I70.242, I70.243, I70.244, I70.245, I70.248, I70.249, I70.25, I70.261, I70.262, I70.263, I70.269, I70.291, I70.292, I70.293, I70.299 |     |
| Exclusion                                 | 237.70, 237.71, 237.72, 237.73, 237.79, 443.1, 446.0, 446.4, 446.5, 446.6, 446.7, 710.1, 747.10, 747.11, 747.22, 747.64 | I73.1, M30.0, M31.1, M31.30, M31.31, M31.4, M31.5, M31.6, M34.0, M34.1, Q25.1, Q25.21, Q25.29, Q25.3, Q27.32, Q85.00, Q85.01, Q85.02, Q85.03, Q85.09                                                                                                                                                                     |     |

**Table S5. Incidence rate and prevalence of isolated hypertriglyceridemia.**

|                                                                                  | Incidence Rate* (95% CI) |                     | Prevalence† (95% CI) |                   |
|----------------------------------------------------------------------------------|--------------------------|---------------------|----------------------|-------------------|
|                                                                                  | Olmsted County           | US‡                 | Olmsted County       | US‡               |
| Isolated Hypertriglyceridemia (triglyceride ≥500 mg/dL and Non-HDL-C <190 mg/dL) |                          |                     |                      |                   |
| Male (n = 843)                                                                   | 68.44 (63.90-73.22)      | 75.49 (70.28-80.70) | 2.02% (1.86-2.16)    | 2.26% (2.08-2.42) |
| Female (n = 383)                                                                 | 28.65 (25.85-31.67)      | 30.95 (27.80-34.09) | 0.89% (0.79-1.00)    | 1.03% (0.91-1.15) |
| Total (n = 1,226)                                                                | 47.73 (45.09-50.48)      | 52.86 (49.85-55.87) | 1.42% (1.33-1.51)    | 1.61% (1.50-1.71) |

\* Incidence rates for 100,000 person-year. Incidence rates were measured by 1,231,727 person-year of follow-up in males and 1,336,917 in females.

† Prevalence rates are calculated as the mean value of adults (18-95 years), weighted to the population counts of Olmsted County or the United States whites from 2010 census estimates. Confidence limits are calculated using the 2.5th and 97.5th percentile of all prevalence rates across 1,000 bootstrapped samples (within each sample, the prevalence rate is the mean rate across all ages, as above).

‡ Sex-specific incidence rates are adjusted to the age distribution of the US white population from 2010, overall incidence rates are adjusted to the age and sex distribution of the US white population from 2010.

**Table S6. Lipid-lowering medications in the 18-month period before the index date, after the index date, and before the last follow-up, based on the indication of treatment and age categories.**

|                                                               | No Treatment | Non-statin only | Statin only | Both statin and non-statin |
|---------------------------------------------------------------|--------------|-----------------|-------------|----------------------------|
| <b>All cases (all ages) (n=517)</b>                           |              |                 |             |                            |
| 18-months before the index date                               | 72%          | 7%              | 17%         | 5%                         |
| 18-months after the index date                                | 48%          | 21%             | 18%         | 13%                        |
| 18-months before the last follow-up*                          | 32%          | 14%             | 38%         | 17%                        |
| <b>Primary prevention<sup>†</sup> (all ages) (n=412)</b>      |              |                 |             |                            |
| 18-months before the index date                               | 78%          | 7%              | 12%         | 3%                         |
| 18-months after the index date                                | 54%          | 22%             | 14%         | 10%                        |
| 18-months before the last follow-up*                          | 35%          | 16%             | 35%         | 15%                        |
| <b>Secondary prevention<sup>‡</sup> (all ages) (n=105)</b>    |              |                 |             |                            |
| 18-months before the index date                               | 49%          | 4%              | 35%         | 12%                        |
| 18-months after the index date                                | 27%          | 15%             | 30%         | 28%                        |
| 18-months before the last follow-up*                          | 18%          | 7%              | 49%         | 26%                        |
| <b>Primary prevention<sup>†</sup> (&lt;40 years) (n=130)</b>  |              |                 |             |                            |
| 18-months before the index date                               | 86%          | 9%              | 5%          | 0%                         |
| 18-months after the index date                                | 65%          | 23%             | 6%          | 6%                         |
| 18-months before the last follow-up*                          | 53%          | 22%             | 18%         | 7%                         |
| <b>Primary prevention<sup>†</sup> (40 - 54 years) (n=178)</b> |              |                 |             |                            |
| 18-months before the index date                               | 80%          | 6%              | 11%         | 3%                         |
| 18-months after the index date                                | 54%          | 25%             | 13%         | 7%                         |
| 18-months before the last follow-up*                          | 31%          | 14%             | 37%         | 18%                        |
| <b>Primary prevention<sup>†</sup> (55 – 69 years) (n=84)</b>  |              |                 |             |                            |
| 18-months before the index date                               | 68%          | 7%              | 23%         | 2%                         |
| 18-months after the index date                                | 39%          | 18%             | 26%         | 17%                        |
| 18-months before the last follow-up*                          | 18%          | 10%             | 54%         | 18%                        |
| <b>Primary prevention<sup>†</sup> (≥70 years) (n=20)</b>      |              |                 |             |                            |
| 18-months before the index date                               | 50%          | 5%              | 25%         | 20%                        |
| 18-months after the index date                                | 35%          | 15%             | 25%         | 25%                        |
| 18-months before the last follow-up*                          | 32%          | 21%             | 37%         | 11%                        |

\* In cases with at least 36 months follow-up. <sup>†</sup>Primary prevention is defined as cases with no coronary heart disease, cerebrovascular disease, or peripheral artery disease at the time of prescription. <sup>‡</sup>Secondary prevention is defined as cases with coronary heart disease, or cerebrovascular disease, or peripheral artery at the time of prescription.



**Table S7. Rate of baseline and incident event in cases and controls.**

|                                   | <b>Controls<br/>(n = 766)</b> | <b>Cases<br/>(n = 517)</b> | <b>P-value*</b> |
|-----------------------------------|-------------------------------|----------------------------|-----------------|
| CHD events                        | 155 (20.2%)                   | 166 (32.1%)                |                 |
| Baseline CHD events               | 73 (9.5%)                     | 84 (16.2%)                 | <0.001          |
| New CHD events <sup>†</sup>       | 82 (11.8%)                    | 82 (18.9%)                 | <0.001          |
| CVD events                        | 78 (10.2%)                    | 77 (14.9%)                 |                 |
| Baseline CVD events               | 22 (2.9%)                     | 32 (6.2%)                  | 0.005           |
| New CVD events <sup>†</sup>       | 56 (7.5%)                     | 45 (9.3%)                  | 0.139           |
| PAD events                        | 19 (2.5%)                     | 19 (3.7%)                  |                 |
| Baseline PAD events               | 9 (1.2%)                      | 9 (1.7%)                   | 0.401           |
| New PAD events <sup>†</sup>       | 10 (1.3%)                     | 10 (2.0%)                  | 0.305           |
| Composite Endpoint                | 198 (25.8%)                   | 195 (37.7%)                |                 |
| Baseline composite events         | 89 (11.6%)                    | 105 (20.3%)                | <0.001          |
| New composite events <sup>†</sup> | 109 (16.1%)                   | 90 (21.8%)                 | 0.003           |

CHD, coronary heart disease; CVD, cerebrovascular disease; PAD; peripheral artery disease. \*P-values are unadjusted logistic (baseline) and Cox (new) event models. <sup>†</sup>Excludes people with baseline events.

**Table S8. Hazard ratios for CHD, CVD, PAD, and composite endpoint in Cox proportional hazards regression model in PIH cases in comparison with controls.**

|                                          | CHD<br>(number of<br>events = 164) |         | CVD<br>(number of<br>events = 101) |         | PAD<br>(number of<br>events = 20) |         | Composite Endpoint<br>(number of<br>events = 199) |         |
|------------------------------------------|------------------------------------|---------|------------------------------------|---------|-----------------------------------|---------|---------------------------------------------------|---------|
|                                          | HR<br>(95% CI)                     | P-Value | HR<br>(95% CI)                     | P-Value | HR<br>(95% CI)                    | P-Value | HR<br>(95% CI)                                    | P-Value |
| Primary Isolated<br>Hypertriglyceridemia | 1.53<br>(1.06 - 2.20)              | 0.022   | 1.06<br>(0.65 - 1.73)              | 0.813   | 1.27<br>(0.43 - 3.75)             | 0.668   | 1.28<br>(0.92 - 1.80)                             | 0.148   |
| Age (per 10 year increase)               | 1.75<br>(1.53 - 2.00)              | <0.001  | 1.94<br>(1.62 - 2.32)              | <0.001  | 1.53<br>(1.04 - 2.24)             | 0.029   | 1.84<br>(1.62 - 2.08)                             | <0.001  |
| Sex (male vs female)                     | 1.82<br>(1.25 - 2.66)              | 0.002   | 1.47<br>(0.92 - 2.35)              | 0.112   | 2.26<br>(0.71 - 7.22)             | 0.168   | 2.04<br>(1.44 - 2.90)                             | <0.001  |
| Race (non-white vs white)                | 1.05<br>(0.57 - 1.94)              | 0.881   | 0.69<br>(0.27 - 1.74)              | 0.426   | 0.56<br>(0.07 - 4.50)             | 0.588   | 1.11<br>(0.64 - 1.93)                             | 0.715   |
| Education                                |                                    | 0.023   |                                    | 0.362   |                                   | 0.712   |                                                   | 0.041   |
| 12 – 15 years                            | 3.10<br>(1.22 - 7.87)              |         | 0.83<br>(0.40 - 1.74)              |         | 0.63<br>(0.12 - 3.28)             |         | 1.99<br>(0.97 - 4.06)                             |         |
| ≥ 16 years                               | 2.34<br>(0.90 - 6.04)              |         | 0.64<br>(0.30 - 1.38)              |         | 0.91<br>(0.18 - 4.68)             |         | 1.47<br>(0.71 - 3.04)                             |         |
| Family history of CHD                    | 2.45<br>(1.61 - 3.72)              | <0.001  | 1.39<br>(0.75 - 2.56)              | 0.299   | 1.01<br>(0.23 - 4.42)             | 0.990   | 1.93<br>(1.29 - 2.89)                             | 0.001   |
| Hypertension                             | 1.02<br>(0.71 - 1.45)              | 0.932   | 1.96<br>(1.18 - 3.27)              | 0.010   | 1.32<br>(0.45 - 3.88)             | 0.614   | 1.06<br>(0.77 - 1.47)                             | 0.710   |
| Diabetes Mellitus                        | 1.21<br>(0.80 - 1.81)              | 0.364   | 1.29<br>(0.78 - 2.15)              | 0.325   | 1.68<br>(0.54 - 5.24)             | 0.370   | 1.24<br>(0.84 - 1.82)                             | 0.283   |
| Smoking status                           |                                    | 0.079   |                                    | 0.545   |                                   | 0.751   |                                                   | 0.069   |
| Missing                                  | 1.24<br>(0.65 - 2.37)              |         | 1.27<br>(0.58 - 2.79)              |         | 1.83<br>(0.38 - 8.78)             |         | 1.48<br>(0.86 - 2.55)                             |         |
| Tobacco history                          | 1.54<br>(1.06 - 2.25)              |         | 1.30<br>(0.81 - 2.06)              |         | 1.21<br>(0.42 - 3.49)             |         | 1.47<br>(1.05 - 2.06)                             |         |
| Body Mass Index                          |                                    | 0.810   |                                    | 0.284   |                                   | 0.980   |                                                   | 0.416   |
| Underweight, <18.5 kg/m <sup>2</sup>     | 1.72<br>(0.23 - 13.03)             |         | NA                                 |         | NA                                |         | 1.02<br>(0.14 - 7.59)                             |         |
| Missing                                  | 1.16<br>(0.43 - 3.14)              |         | 0.24<br>(0.05 - 1.14)              |         | 0.71<br>(0.06 - 9.12)             |         | 0.62<br>(0.25 - 1.58)                             |         |
| Overweight, 25-29 kg/m <sup>2</sup>      | 1.29<br>(0.80 - 2.08)              |         | 0.69<br>(0.39 - 1.22)              |         | 0.65<br>(0.18 - 2.36)             |         | 0.86<br>(0.57 - 1.29)                             |         |
| Obese, 30-34 kg/m <sup>2</sup>           | 1.36<br>(0.80 - 2.31)              |         | 0.90<br>(0.49 - 1.68)              |         | 0.73<br>(0.17 - 3.08)             |         | 1.13<br>(0.72 - 1.77)                             |         |
| Total Cholesterol                        |                                    | 0.787   |                                    | 0.988   |                                   | 0.897   |                                                   | 0.869   |
| 200-239 mg/dL                            | 0.92<br>(0.66 - 1.28)              |         | 0.97<br>(0.63 - 1.48)              |         | 1.26<br>(0.48 - 3.27)             |         | 1.05<br>(0.77 - 1.41)                             |         |
| ≥240 mg/dL                               | 1.22<br>(0.44 - 3.39)              |         | 0.97<br>(0.23 - 4.08)              |         | NA                                |         | 1.25<br>(0.50 - 3.13)                             |         |

CHD, coronary heart disease; CVD, cerebrovascular disease; PAD; peripheral artery disease.

**Figure S1. Age-specific prevalence (%) of isolated hypertriglyceridemia in adults (triglyceride  $\geq 500$  mg/dL and Non-HDL-C  $< 190$  mg/dL) adjusted to the US white population.**

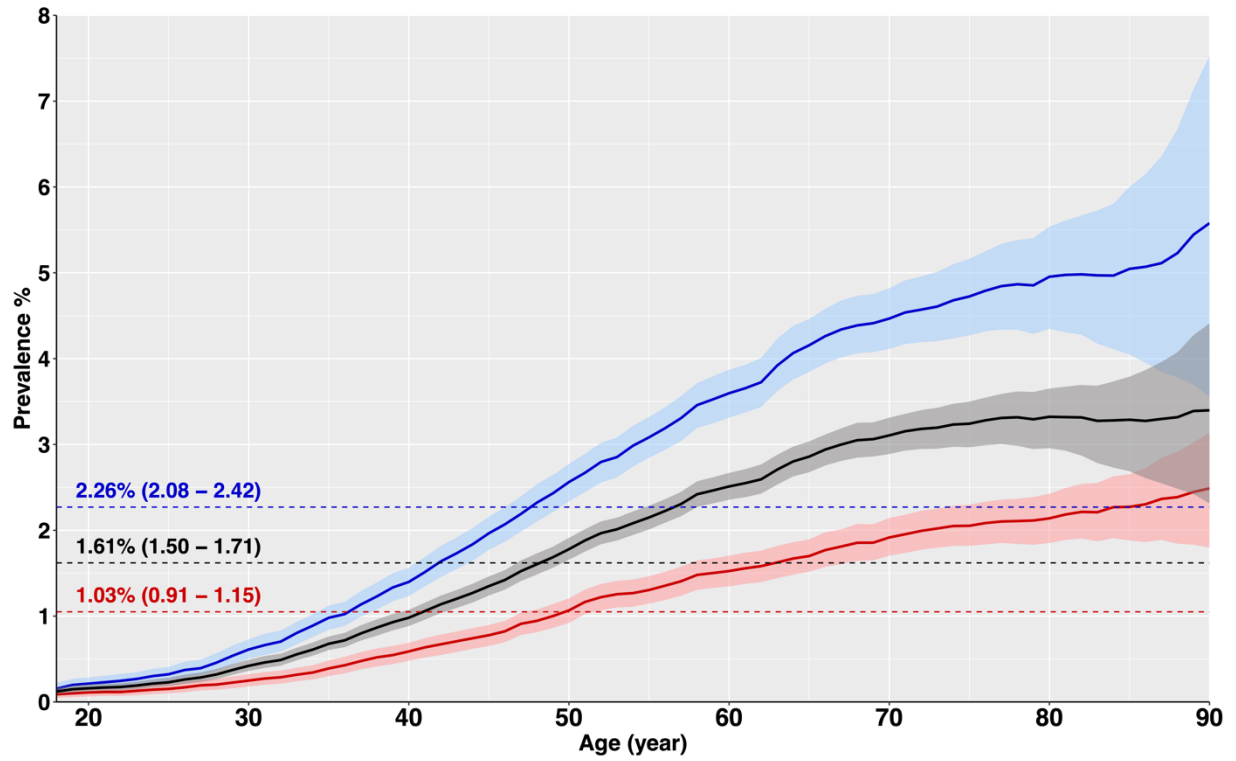

Males are depicted in blue and females in red and the overall in black. Dashed lines represent mean prevalence values for adults (age 18-95 years).

**Figure S2. Prescription of lipid-lowering medication for primary prevention in the 18-month period after detection of primary isolated hypertriglyceridemia.**

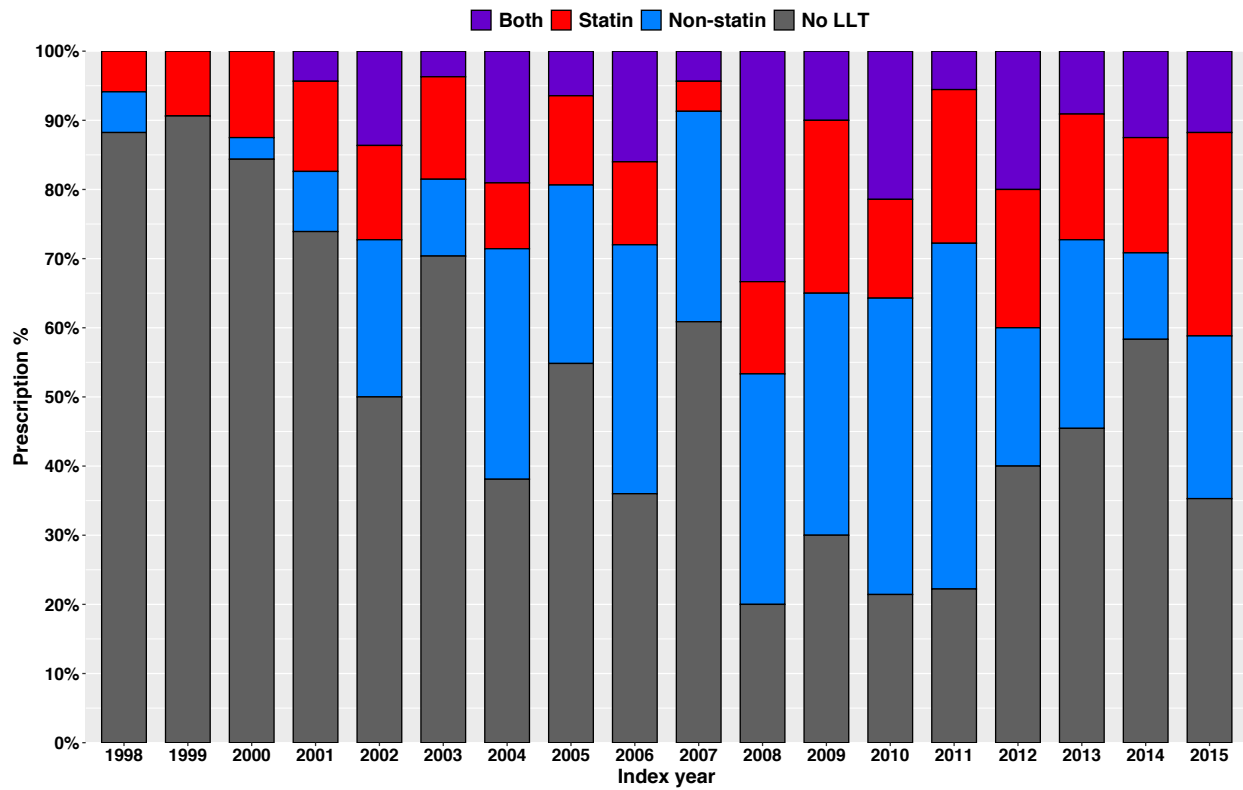

LLT, lipid-lowering treatment.

**Figure S3. Status of control based on three thresholds in primary vs. secondary prevention and in different age categories.**

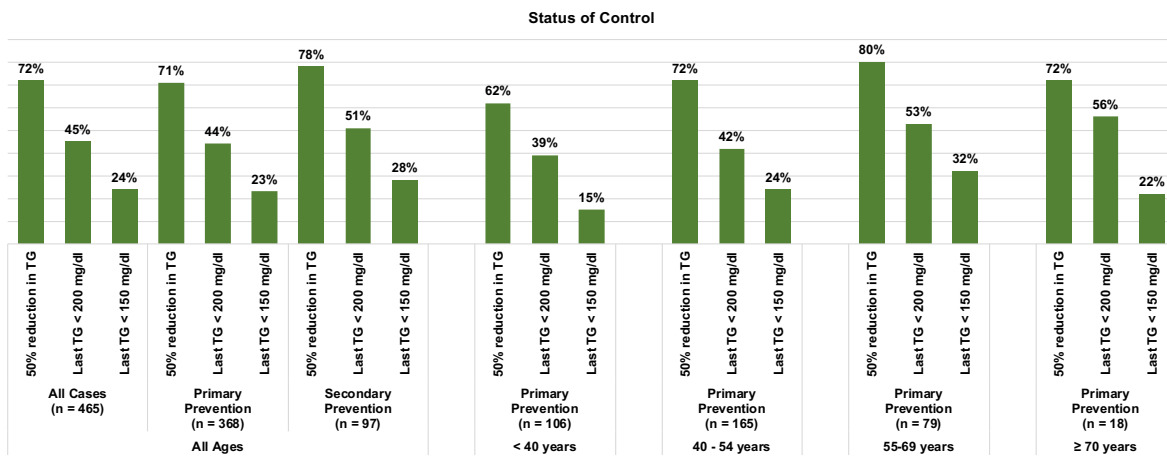

Supplement: JAH3-10-e019343-s001.pdf [file JAH3-10-e019343-s001.pdf]
